# Supplementary material for: Effects of Sodium Bicarbonate on High-Intensity Endurance Performance in Cyclists: A Double-Blind, Randomized Cross-Over Trial
Source: PubMed Central journal article supplement (PMC4262454; doi:10.1371/journal.pone.0114729), 2014-12-10
Supplement: pone.0114729.s002.pdf [file pone.0114729.s002.pdf]

## Baseline characteristics

| <b>n</b> | <b>gender</b><br>m=1, f=2 | <b>type of sport</b><br>rb =1, mb=2,<br>tri=3 | <b>age</b><br>[y] | <b>height</b><br>[cm] | <b>weight</b><br>[kg] | <b>BMI</b><br>[kg/m <sup>2</sup> ] | <b>VO<sub>2peak</sub></b><br>[ml·min <sup>-1</sup> ·kg <sup>-1</sup> ] |
|----------|---------------------------|-----------------------------------------------|-------------------|-----------------------|-----------------------|------------------------------------|------------------------------------------------------------------------|
| 1        | 1                         | 2                                             | 28                | 188                   | 78                    | 20.1                               | 76.6                                                                   |
| 2        | 1                         | 1                                             | 27                | 183                   | 69                    | 20.7                               | 77.0                                                                   |
| 3        | 1                         | 3                                             | 21                | 178                   | 69                    | 21.8                               | 70.3                                                                   |
| 4        | 2                         | 3                                             | 24                | 171                   | 50                    | 17.1                               | 63.5                                                                   |
| 5        | 1                         | 1                                             | 23                | 172                   | 63                    | 21.3                               | 75.2                                                                   |
| 6        | 2                         | 1                                             | 19                | 173                   | 59                    | 19.7                               | 62.6                                                                   |
| 7        | 1                         | 1                                             | 27                | 186                   | 76                    | 22.0                               | 78.6                                                                   |
| 8        | 1                         | 2                                             | 20                | 178                   | 76                    | 23.9                               | 71.3                                                                   |
| 9        | 1                         | 2                                             | 18                | 180                   | 71                    | 21.9                               | 84.6                                                                   |
| 10       | 1                         | 2                                             | 18                | 183                   | 72                    | 21.5                               | 73.8                                                                   |
| 11       | 1                         | 1                                             | 24                | 179                   | 70                    | 21.8                               | 57.9                                                                   |
| 12       | 1                         | 2                                             | 19                | 178                   | 72                    | 22.7                               | 71.4                                                                   |
| 13       | 2                         | 1                                             | 44                | 182                   | 74                    | 22.3                               | 50.1                                                                   |
| 14       | 1                         | 2                                             | 20                | 174                   | 65                    | 21.5                               | 63.0                                                                   |
| 15       | 1                         | 2                                             | 18                | 191                   | 85                    | 23.4                               | 71.3                                                                   |
| 16       | 1                         | 1                                             | 25                | 181                   | 69                    | 21.1                               | 64.6                                                                   |
| 17       | 1                         | 2                                             | 21                | 172                   | 69                    | 23.3                               | 71.8                                                                   |
| 18       | 1                         | 2                                             | 19                | 179                   | 64                    | 20.0                               | 66.3                                                                   |
| 19       | 1                         | 3                                             | 22                | 178                   | 71                    | 22.4                               | 65.0                                                                   |
| 20       | 2                         | 1                                             | 47                | 168                   | 51                    | 18.1                               | 47.4                                                                   |
| 21       | 2                         | 1                                             | 28                | 159                   | 52                    | 20.6                               | 50.5                                                                   |

m= male; f= female; rb = racing bike; mb= mountain bike; tri= triathlon

## incremental exercise test (placebo)

| n  | pH pre | pH post | pH 2 min p | BIC pre<br>[mmol·l <sup>-1</sup> ] | BIC post<br>[mmol·l <sup>-1</sup> ] | BIC 2 min p<br>[mmol·l <sup>-1</sup> ] | BE pre<br>[mmol·l <sup>-1</sup> ] | BE post<br>[mmol·l <sup>-1</sup> ] | BE 2 min p<br>[mmol·l <sup>-1</sup> ] |
|----|--------|---------|------------|------------------------------------|-------------------------------------|----------------------------------------|-----------------------------------|------------------------------------|---------------------------------------|
| 1  | 7.43   | 7.42    | 7.18       | 24                                 | 25                                  | 11                                     | 1                                 | 1                                  | -17                                   |
| 2  | 7.41   | 7.41    | 7.07       | 25                                 | 24                                  | 9                                      | 1                                 | 0                                  | -21                                   |
| 3  | 7.44   | 7.43    | 7.21       | 26                                 | 26                                  | 13                                     | 3                                 | 2                                  | -14                                   |
| 4  | 7.45   | 7.43    | 7.26       | 22                                 | 22                                  | 10                                     | -1                                | -1                                 | -16                                   |
| 5  | 7.42   | 7.40    | 7.11       | 25                                 | 25                                  | 10                                     | 1                                 | 1                                  | -19                                   |
| 6  | 7.42   | 7.42    | 7.03       | 22                                 | 22                                  | 7                                      | -1                                | -1                                 | -23                                   |
| 7  | 7.44   | 7.42    | 7.12       | 25                                 | 24                                  | 10                                     | 2                                 | 1                                  | -19                                   |
| 8  | 7.45   | 7.41    | 7.23       | 25                                 | 24                                  | 14                                     | 2                                 | 0                                  | -12                                   |
| 9  | 7.44   | 7.41    | 7.20       | 26                                 | 25                                  | 12                                     | 2                                 | 1                                  | -16                                   |
| 10 | 7.45   | 7.43    | 7.18       | 26                                 | 25                                  | 13                                     | 3                                 | 1                                  | -15                                   |
| 11 | 7.42   | 7.42    | 7.14       | 25                                 | 26                                  | 10                                     | 1                                 | 2                                  | -18                                   |
| 12 | 7.41   | 7.42    | 7.15       | 24                                 | 24                                  | 9                                      | 0                                 | 0                                  | -19                                   |
| 13 | 7.44   | 7.41    | 7.27       | 24                                 | 18                                  | 12                                     | 1                                 | -5                                 | -13                                   |
| 14 | 7.42   | 7.41    | 7.20       | 26                                 | 25                                  | 12                                     | 2                                 | 0                                  | -15                                   |
| 15 | 7.44   | 7.43    | 7.23       | 26                                 | 26                                  | 14                                     | 3                                 | 2                                  | -12                                   |
| 16 | 7.43   | 7.42    | 7.30       | 26                                 | 24                                  | 16                                     | 2                                 | 0                                  | -9                                    |
| 17 | 7.44   | 7.41    | 7.10       | 26                                 | 25                                  | 9                                      | 2                                 | 1                                  | -20                                   |
| 18 | 7.50   | 7.43    | 7.11       | 27                                 | 26                                  | 10                                     | 4                                 | 2                                  | -20                                   |
| 19 | 7.43   | 7.41    | 7.19       | 26                                 | 25                                  | 11                                     | 2                                 | 1                                  | -16                                   |
| 20 | 7.44   | 7.43    | 7.28       | 23                                 | 23                                  | 14                                     | 0                                 | 0                                  | -12                                   |
| 21 | 7.42   | 7.42    | 7.21       | 23                                 | 23                                  | 13                                     | -1                                | -1                                 | -14                                   |

pre = pre drink; post = post drink; 2 min p= 2 min post exercise; BIC = bicarbonate concentration; BE = base excess

## incremental exercise test (placebo)

| n  | pCO <sub>2</sub> pre<br>[mmHg] | pCO <sub>2</sub> post<br>[mmHg] | pCO <sub>2</sub> 2 min p<br>[mmHg] | pO <sub>2</sub> pre<br>[mmHg] | pO <sub>2</sub> post<br>[mmHg] | pO <sub>2</sub> 2 min p<br>[mmHg] | SO <sub>2</sub> pre<br>[%] | SO <sub>2</sub> post<br>[%] | SO <sub>2</sub> 2min p<br>[%] |
|----|--------------------------------|---------------------------------|------------------------------------|-------------------------------|--------------------------------|-----------------------------------|----------------------------|-----------------------------|-------------------------------|
| 1  | 37                             | 39                              | 29                                 | 86                            | 90                             | 95                                | 97                         | 97                          | 96                            |
| 2  | 39                             | 40                              | 32                                 | 90                            | 94                             | 89                                | 97                         | 97                          | 93                            |
| 3  | 40                             | 40                              | 33                                 | 83                            | 85                             | 96                                | 96                         | 97                          | 96                            |
| 4  | 32                             | 34                              | 23                                 | 94                            | 95                             | 108                               | 97                         | 97                          | 97                            |
| 5  | 39                             | 41                              | 33                                 | 81                            | 88                             | 93                                | 96                         | 99                          | 94                            |
| 6  | 35                             | 36                              | 27                                 | 89                            | 84                             | 98                                | 97                         | 96                          | 94                            |
| 7  | 38                             | 38                              | 33                                 | 89                            | 83                             | 95                                | 97                         | 96                          | 95                            |
| 8  | 37                             | 39                              | 35                                 | 84                            | 85                             | 88                                | 97                         | 96                          | 95                            |
| 9  | 39                             | 40                              | 31                                 | 79                            | 87                             | 103                               | 96                         | 97                          | 97                            |
| 10 | 39                             | 39                              | 35                                 | 75                            | 80                             | 95                                | 95                         | 96                          | 96                            |
| 11 | 39                             | 40                              | 32                                 | 78                            | 79                             | 97                                | 96                         | 96                          | 95                            |
| 12 | 38                             | 38                              | 28                                 | 95                            | 90                             | 95                                | 97                         | 97                          | 95                            |
| 13 | 36                             | 29                              | 28                                 | 86                            | 75                             | 91                                | 97                         | 95                          | 96                            |
| 14 | 41                             | 40                              | 30                                 | 86                            | 80                             | 103                               | 96                         | 96                          | 97                            |
| 15 | 39                             | 41                              | 36                                 | 77                            | 78                             | 88                                | 96                         | 96                          | 95                            |
| 16 | 39                             | 38                              | 33                                 | 79                            | 91                             | 90                                | 96                         | 97                          | 96                            |
| 17 | 39                             | 40                              | 31                                 | 84                            | 86                             | 97                                | 96                         | 96                          | 95                            |
| 18 | 35                             | 40                              | 31                                 | 76                            | 85                             | 91                                | 96                         | 97                          | 94                            |
| 19 | 40                             | 41                              | 31                                 | 79                            | 85                             | 96                                | 96                         | 96                          | 96                            |
| 20 | 32                             | 36                              | 30                                 | 79                            | 89                             | 96                                | 96                         | 97                          | 97                            |
| 21 | 36                             | 36                              | 34                                 | 91                            | 89                             | 93                                | 97                         | 97                          | 96                            |

pre = pre drink; post = post drink; 2 min p= 2 min post exercise; pCO<sub>2</sub> = partial pressure of carbon dioxide;  
pO<sub>2</sub> = partial pressure of oxygen; SO<sub>2</sub> = oxygen saturation

## incremental exercise test (placebo)

| n  | HR rest<br>[bpm] | HR max<br>[bpm] | P max<br>[W] | P max<br>[W·kg <sup>-1</sup> ] | VO <sub>2peak</sub><br>[ml·min <sup>-1</sup> ] | VO <sub>2peak</sub><br>[ml·min <sup>-1</sup> ·kg <sup>-1</sup> ] | RER  | Lac rest<br>[mmol·l <sup>-1</sup> ] | Lac max<br>[mmol·l <sup>-1</sup> ] | IAT<br>[W] | IAT<br>[W·kg <sup>-1</sup> ] |
|----|------------------|-----------------|--------------|--------------------------------|------------------------------------------------|------------------------------------------------------------------|------|-------------------------------------|------------------------------------|------------|------------------------------|
| 1  | 75               | 193             | 450          | 5.9                            | 5825                                           | 76.6                                                             | 1.20 | 0.7                                 | 12.9                               | 351        | 4.5                          |
| 2  | 58               | 200             | 408          | 5.8                            | 5533                                           | 77.0                                                             | 1.12 | 0.8                                 | 15.0                               | 292        | 4.2                          |
| 3  | 77               | 186             | 342          | 5.0                            | 4781                                           | 70.3                                                             | 1.13 | 0.7                                 | 13.6                               | 230        | 3.3                          |
| 4  | 66               | 184             | 233          | 4.7                            | 3175                                           | 63.5                                                             | 1.18 | 1.0                                 | 10.5                               | 150        | 3.0                          |
| 5  | 51               | 188             | 325          | 5.2                            | 4924                                           | 75.2                                                             | 1.24 | 0.8                                 | 14.3                               | 216        | 3.4                          |
| 6  | 67               | 185             | 283          | 4.8                            | 3694                                           | 62.6                                                             | 1.19 | 0.8                                 | 15.0                               | 180        | 3.1                          |
| 7  | 60               | 185             | 383          | 5.1                            | 5891                                           | 78.6                                                             | 1.19 | 0.7                                 | 13.4                               | 284        | 3.7                          |
| 8  | 88               | 202             | 367          | 5.0                            | 5608                                           | 71.3                                                             | 1.13 | 0.6                                 | 8.4                                | 259        | 3.4                          |
| 9  | 88               | 202             | 417          | 5.9                            | 6006                                           | 84.6                                                             | 1.02 | 0.9                                 | 10.5                               | 299        | 4.2                          |
| 10 | 64               | 186             | 400          | 5.6                            | 5312                                           | 73.8                                                             | 1.04 | 1.1                                 | 11.0                               | 290        | 4.0                          |
| 11 | 69               | 179             | 333          | 4.8                            | 4025                                           | 57.9                                                             | 1.16 | 0.6                                 | 14.0                               | 228        | 3.3                          |
| 12 | 51               | 195             | 400          | 5.4                            | 4844                                           | 71.4                                                             | 1.18 | 0.8                                 | 13.0                               | 263        | 3.7                          |
| 13 | 72               | 162             | 292          | 4.0                            | 3551                                           | 50.1                                                             | 1.17 | 0.6                                 | 9.8                                | 195        | 2.6                          |
| 14 | 57               | 184             | 300          | 4.7                            | 4033                                           | 63.0                                                             | 1.21 | 0.5                                 | 12.5                               | 200        | 3.1                          |
| 15 | 86               | 212             | 392          | 4.6                            | 6062                                           | 71.3                                                             | 1.03 | 0.5                                 | 9.6                                | 190        | 2.2                          |
| 16 | 83               | 199             | 325          | 4.7                            | 4460                                           | 64.6                                                             | 1.16 | 0.5                                 | 8.1                                | 240        | 3.5                          |
| 17 | 66               | 189             | 375          | 5.4                            | 4954                                           | 71.8                                                             | 1.11 | 0.7                                 | 14.0                               | 268        | 3.9                          |
| 18 | 98               | 200             | 358          | 5.6                            | 4244                                           | 66.3                                                             | 1.30 | 0.7                                 | 14.5                               | 262        | 4.1                          |
| 19 | 76               | 195             | 325          | 4.6                            | 4618                                           | 65.0                                                             | 1.16 | 0.8                                 | 12.0                               | 232        | 3.3                          |
| 20 | 53               | 170             | 208          | 4.1                            | 2303                                           | 47.4                                                             | 1.22 | 0.6                                 | 9.0                                | 138        | 2.7                          |
| 21 | 76               | 201             | 208          | 4.0                            | 2628                                           | 50.5                                                             | 1.32 | 0.7                                 | 9.5                                | 133        | 2.6                          |

HR rest = heart rate at rest; HR max = maximum heart rate; P max= maximum performance; RER= respiratory exchange ratio;

Lac rest= lactate concentration at rest; Lac max= lactate concentration at exhaustion; IAT= individual anaerobic threshold

## incremental exercise test (BICA)

| n  | pH pre | pH post | pH 2 min p | BIC pre<br>[mmol·l <sup>-1</sup> ] | BIC post<br>[mmol·l <sup>-1</sup> ] | BIC 2 min p<br>[mmol·l <sup>-1</sup> ] | BE pre<br>[mmol·l <sup>-1</sup> ] | BE post<br>[mmol·l <sup>-1</sup> ] | BE 2 min p<br>[mmol·l <sup>-1</sup> ] |
|----|--------|---------|------------|------------------------------------|-------------------------------------|----------------------------------------|-----------------------------------|------------------------------------|---------------------------------------|
| 1  | 7.41   | 7.48    | 7.30       | 25                                 | 31                                  | 14                                     | 1                                 | 7                                  | -10                                   |
| 2  | 7.43   | 7.49    | 7.20       | 26                                 | 32                                  | 12                                     | 2                                 | 8                                  | -15                                   |
| 3  | 7.43   | 7.46    | 7.24       | 26                                 | 31                                  | 15                                     | 2                                 | 6                                  | -12                                   |
| 4  | 7.45   | 7.49    | 7.38       | 21                                 | 29                                  | 9                                      | -2                                | 5                                  | -14                                   |
| 5  | 7.40   | 7.44    | 7.17       | 25                                 | 32                                  | 12                                     | 1                                 | 7                                  | -16                                   |
| 6  | 7.43   | 7.47    | 7.16       | 24                                 | 28                                  | 10                                     | 1                                 | 5                                  | -18                                   |
| 7  | 7.42   | 7.50    | 7.17       | 26                                 | 30                                  | 12                                     | 2                                 | 7                                  | -15                                   |
| 8  | 7.42   | 7.47    | 7.30       | 25                                 | 32                                  | 16                                     | 1                                 | 8                                  | -9                                    |
| 9  | 7.43   | 7.50    | 7.24       | 25                                 | 31                                  | 14                                     | 1                                 | 8                                  | -12                                   |
| 10 | 7.42   | 7.49    | 7.23       | 28                                 | 34                                  | 16                                     | 3                                 | 10                                 | -11                                   |
| 11 | 7.44   | 7.50    | 7.19       | 26                                 | 33                                  | 13                                     | 2                                 | 9                                  | -15                                   |
| 12 | 7.44   | 7.49    | 7.20       | 25                                 | 31                                  | 12                                     | 2                                 | 7                                  | -15                                   |
| 13 | 7.46   | 7.50    | 7.40       | 24                                 | 32                                  | 18                                     | 1                                 | 8                                  | -5                                    |
| 14 | 7.42   | 7.46    | 7.25       | 26                                 | 32                                  | 15                                     | 2                                 | 8                                  | -11                                   |
| 15 | 7.44   | 7.49    | 7.21       | 26                                 | 32                                  | 14                                     | 2                                 | 8                                  | -13                                   |
| 16 | 7.39   | 7.48    | 7.29       | 24                                 | 31                                  | 17                                     | 0                                 | 7                                  | -9                                    |
| 17 | 7.40   | 7.46    | 7.15       | 25                                 | 31                                  | 11                                     | 0                                 | 7                                  | -17                                   |
| 18 | 7.45   | 7.49    | 7.18       | 27                                 | 33                                  | 12                                     | 3                                 | 9                                  | -15                                   |
| 19 | 7.42   | 7.47    | 7.22       | 25                                 | 30                                  | 12                                     | 1                                 | 6                                  | -12                                   |
| 20 | 7.44   | 7.48    | 7.34       | 23                                 | 29                                  | 17                                     | 0                                 | 6                                  | -8                                    |
| 21 | 7.44   | 7.52    | 7.26       | 24                                 | 30                                  | 15                                     | 0                                 | 7                                  | -11                                   |

pre = pre drink; post = post drink; 2 min p= 2 min post exercise; BIC = bicarbonate concentration; BE = base excess

## incremental exercise test (BICA)

| n  | pCO <sub>2</sub> pre<br>[mmHg] | pCO <sub>2</sub> post<br>[mmHg] | pCO <sub>2</sub> 2 min p<br>[mmHg] | pO <sub>2</sub> pre<br>[mmHg] | pO <sub>2</sub> post<br>[mmHg] | pO <sub>2</sub> 2 min p<br>[mmHg] | SO <sub>2</sub> pre<br>[%] | SO <sub>2</sub> post<br>[%] | SO <sub>2</sub> 2min p<br>[%] | interval<br>[d] |
|----|--------------------------------|---------------------------------|------------------------------------|-------------------------------|--------------------------------|-----------------------------------|----------------------------|-----------------------------|-------------------------------|-----------------|
| 1  | 40                             | 42                              | 30                                 | 97                            | 87                             | 92                                | 97                         | 97                          | 97                            | 7               |
| 2  | 39                             | 42                              | 33                                 | 79                            | 84                             | 87                                | 96                         | 97                          | 95                            | 7               |
| 3  | 40                             | 44                              | 36                                 | 75                            | 76                             | 86                                | 95                         | 96                          | 95                            | 8               |
| 4  | 31                             | 38                              | 16                                 | 101                           | 88                             | 96                                | 98                         | 97                          | 99                            | 6               |
| 5  | 41                             | 49                              | 34                                 | 78                            | 62                             | 86                                | 95                         | 92                          | 94                            | 6               |
| 6  | 37                             | 39                              | 28                                 | 80                            | 77                             | 96                                | 96                         | 96                          | 97                            | 7               |
| 7  | 40                             | 39                              | 35                                 | 80                            | 92                             | 87                                | 96                         | 98                          | 94                            | 7               |
| 8  | 39                             | 44                              | 35                                 | 82                            | 74                             | 84                                | 96                         | 95                          | 95                            | 16              |
| 9  | 39                             | 41                              | 34                                 | 92                            | 85                             | 90                                | 97                         | 97                          | 96                            | 10              |
| 10 | 43                             | 45                              | 39                                 | 75                            | 84                             | 88                                | 95                         | 97                          | 95                            | 7               |
| 11 | 39                             | 43                              | 34                                 | 80                            | 74                             | 90                                | 96                         | 96                          | 95                            | 7               |
| 12 | 38                             | 41                              | 32                                 | 82                            | 70                             | 79                                | 96                         | 95                          | 95                            | 7               |
| 13 | 34                             | 41                              | 30                                 | 83                            | 75                             | 85                                | 97                         | 96                          | 96                            | 7               |
| 14 | 41                             | 45                              | 35                                 | 90                            | 78                             | 96                                | 97                         | 96                          | 96                            | 7               |
| 15 | 38                             | 43                              | 37                                 | 85                            | 76                             | 94                                | 97                         | 96                          | 96                            | 7               |
| 16 | 40                             | 41                              | 35                                 | 75                            | 86                             | 86                                | 95                         | 97                          | 95                            | 5               |
| 17 | 41                             | 43                              | 33                                 | 84                            | 88                             | 91                                | 96                         | 97                          | 95                            | 4               |
| 18 | 39                             | 44                              | 35                                 | 88                            | 76                             | 86                                | 97                         | 96                          | 94                            | 6               |
| 19 | 40                             | 41                              | 30                                 | 83                            | 92                             | 96                                | 96                         | 97                          | 96                            | 8               |
| 20 | 35                             | 40                              | 32                                 | 78                            | 74                             | 93                                | 96                         | 95                          | 97                            | 7               |
| 21 | 36                             | 38                              | 35                                 | 83                            | 86                             | 95                                | 96                         | 97                          | 96                            | 7               |

pre = pre drink; post = post drink; 2 min p= 2 min post exercise; pCO<sub>2</sub> = partial pressure of carbon dioxide;  
pO<sub>2</sub> = partial pressure of oxygen; SO<sub>2</sub> = oxygen saturation; interval= days between incremental exercise tests

## incremental exercise test (BICA)

| n  | HR rest<br>[bpm] | HR max<br>[bpm] | P max<br>[W] | P max<br>[W·kg <sup>-1</sup> ] | VO <sub>2peak</sub><br>[ml·min <sup>-1</sup> ] | VO <sub>2peak</sub><br>[ml·min <sup>-1</sup> ·kg <sup>-1</sup> ] | RER  | Lac rest<br>[mmol·l <sup>-1</sup> ] | Lac max<br>[mmol·l <sup>-1</sup> ] | IAT<br>[W] | IAT<br>[W·kg <sup>-1</sup> ] |
|----|------------------|-----------------|--------------|--------------------------------|------------------------------------------------|------------------------------------------------------------------|------|-------------------------------------|------------------------------------|------------|------------------------------|
| 1  | 65               | 188             | 417          | 5.4                            | 5763                                           | 72.8                                                             | 1.15 | 0.5                                 | 13.8                               | 322        | 4.1                          |
| 2  | 76               | 202             | 417          | 6.0                            | 5161                                           | 73.7                                                             | 1.27 | 0.9                                 | 18.1                               | 280        | 4.1                          |
| 3  | 54               | 187             | 350          | 5.1                            | 4527                                           | 65.6                                                             | 1.29 | 0.6                                 | 13.0                               | 222        | 3.2                          |
| 4  | 46               | 190             | 233          | 4.7                            | 2799                                           | 60.9                                                             | 1.23 | 0.9                                 | 13.8                               | 136        | 2.7                          |
| 5  | 60               | 189             | 325          | 5.2                            | 4352                                           | 69.1                                                             | 1.33 | 0.8                                 | 14.8                               | 207        | 3.3                          |
| 6  | 62               | 185             | 289          | 4.9                            | 3966                                           | 72.2                                                             | 1.21 | 1.1                                 | 15.3                               | 201        | 3.4                          |
| 7  | 79               | 184             | 383          | 5.0                            | 5599                                           | 73.7                                                             | 1.28 | 1.3                                 | 15.8                               | 280        | 3.7                          |
| 8  | 72               | 207             | 367          | 4.8                            | 5420                                           | 70.8                                                             | 1.09 | 0.6                                 | 10.2                               | 273        | 3.6                          |
| 9  | 83               | 201             | 417          | 6.0                            | 5247                                           | 76.0                                                             | 1.16 | 0.6                                 | 13.2                               | 279        | 3.9                          |
| 10 | 75               | 191             | 408          | 5.6                            | 4958                                           | 67.9                                                             | 1.23 | 1.2                                 | 14.5                               | 290        | 4.0                          |
| 11 | 68               | 179             | 342          | 5.0                            | 4040                                           | 58.6                                                             | 1.27 | 1.0                                 | 16.7                               | 242        | 3.5                          |
| 12 | 84               | 192             | 400          | 5.6                            | 5006                                           | 70.5                                                             | 1.21 | 1.1                                 | 14.6                               | 286        | 4.0                          |
| 13 | 59               | 165             | 288          | 4.0                            | 3504                                           | 49.3                                                             | 1.25 | 0.9                                 | 9.9                                | 190        | 2.6                          |
| 14 | 63               | 183             | 300          | 4.6                            | 4056                                           | 60.4                                                             | 1.23 | 0.6                                 | 13.9                               | 198        | 3.0                          |
| 15 | 67               | 208             | 400          | 4.7                            | 6013                                           | 67.7                                                             | 1.06 | 0.5                                 | 14.5                               | 271        | 3.2                          |
| 16 | 83               | 193             | 328          | 4.7                            | 4383                                           | 60.6                                                             | 1.24 | 0.6                                 | 10.9                               | 240        | 3.5                          |
| 17 | 63               | 191             | 383          | 5.5                            | 4848                                           | 69.3                                                             | 1.18 | 0.9                                 | 17.0                               | 250        | 3.6                          |
| 18 | 81               | 198             | 358          | 5.6                            | 4352                                           | 68.0                                                             | 1.20 | 0.7                                 | 18.4                               | 253        | 4.0                          |
| 19 | 74               | 200             | 342          | 4.8                            | 4279                                           | 60.7                                                             | 1.32 | 0.8                                 | 16.4                               | 223        | 3.1                          |
| 20 | 64               | 174             | 213          | 4.2                            | 2393                                           | 45.9                                                             | 1.22 | 0.6                                 | 10.1                               | 132        | 2.6                          |
| 21 | 75               | 204             | 211          | 4.0                            | 2595                                           | 51.4                                                             | 1.49 | 1.2                                 | 12.7                               | 128        | 2.5                          |

HR rest = heart rate at rest; HR max = maximum heart rate; P max= maximum performance; RER= respiratory exchange ratio;

Lac rest= lactate concentration at rest; Lac max= lactate concentration at exhaustion; IAT= individual anaerobic threshold

**constant load test (placebo)**

| n  | ph pre | ph post | ph 5 min | ph 10 min | ph 15 min | ph 20 min | ph 25 min | ph 30 min | ph 35 min | ph 40 min<br>n=15 | ph 45 min<br>n=11 | ph 50 min<br>n=7 | pH 2 min p |
|----|--------|---------|----------|-----------|-----------|-----------|-----------|-----------|-----------|-------------------|-------------------|------------------|------------|
| 1  | 7.41   | 7.41    | 7.38     | 7.41      | 7.40      | 7.39      | 7.39      | 7.39      | 7.39      |                   |                   |                  | 7.39       |
| 2  | 7.45   | 7.47    | 7.36     | 7.37      | 7.37      | 7.36      | 7.34      | 7.34      | 7.29      | 7.27              | 7.23              |                  | 7.23       |
| 3  | 7.43   | 7.44    | 7.39     | 7.39      | 7.38      | 7.38      | 7.40      | 7.40      | 7.38      | 7.36              |                   |                  | 7.36       |
| 4  | 7.44   | 7.44    | 7.39     | 7.41      | 7.41      | 7.42      | 7.43      | 7.42      | 7.41      | 7.39              | 7.40              | 7.39             | 7.39       |
| 5  | 7.41   | 7.41    | 7.34     | 7.34      | 7.34      | 7.34      | 7.36      | 7.35      | 7.32      | 7.30              | 7.29              | 7.28             | 7.23       |
| 6  | 7.43   | 7.41    | 7.37     | 7.35      | 7.36      | 7.37      | 7.36      | 7.37      | 7.32      | 7.31              | 7.29              | 7.24             | 7.24       |
| 7  | 7.42   | 7.43    | 7.34     | 7.35      | 7.35      | 7.37      | 7.37      | 7.38      | 7.35      | 7.30              | 7.25              |                  | 7.25       |
| 8  | 7.43   | 7.42    | 7.38     | 7.39      | 7.38      | 7.38      | 7.38      | 7.39      | 7.38      | 7.38              | 7.38              | 7.34             | 7.34       |
| 9  | 7.44   | 7.39    | 7.37     | 7.36      | 7.36      | 7.37      | 7.36      | 7.37      | 7.35      | 7.32              | 7.30              |                  | 7.30       |
| 10 | 7.41   | 7.42    | 7.32     | 7.34      | 7.37      | 7.37      | 7.38      | 7.37      | 7.37      | 7.36              |                   |                  | 7.35       |
| 11 | 7.42   | 7.41    | 7.39     | 7.38      | 7.38      | 7.38      | 7.39      | 7.40      | 7.35      |                   |                   |                  | 7.35       |
| 12 | 7.43   | 7.40    | 7.33     | 7.35      | 7.34      | 7.36      | 7.36      | 7.36      | 7.34      | 7.33              | 7.32              | 7.32             | 7.29       |
| 13 | 7.46   | 7.46    | 7.41     | 7.43      | 7.44      | 7.43      | 7.43      | 7.45      | 7.40      | 7.41              | 7.41              | 7.43             | 7.44       |
| 14 | 7.41   | 7.40    | 7.33     | 7.35      | 7.36      | 7.37      | 7.38      | 7.37      | 7.35      |                   |                   |                  | 7.32       |
| 15 | 7.44   | 7.41    | 7.37     | 7.40      | 7.39      | 7.39      | 7.39      | 7.39      | 7.39      |                   |                   |                  | 7.39       |
| 16 | 7.46   | 7.41    | 7.35     | 7.36      | 7.37      | 7.37      | 7.39      | 7.39      | 7.37      |                   |                   |                  | 7.37       |
| 17 | 7.42   | 7.39    | 7.37     | 7.38      | 7.39      | 7.39      | 7.39      | 7.37      | 7.29      |                   |                   |                  | 7.29       |
| 18 | 7.43   | 7.43    | 7.32     | 7.33      | 7.35      | 7.37      | 7.36      | 7.35      | 7.27      | 7.21              |                   |                  | 7.21       |
| 19 | 7.44   | 7.42    | 7.33     | 7.34      | 7.34      | 7.36      | 7.39      | 7.39      | 7.34      | 7.29              |                   |                  | 7.29       |
| 20 | 7.43   | 7.39    | 7.34     | 7.34      | 7.37      | 7.39      | 7.38      | 7.41      | 7.38      | 7.37              | 7.37              |                  | 7.37       |
| 21 | 7.44   | 7.40    | 7.34     | 7.36      | 7.38      | 7.39      | 7.40      | 7.39      | 7.38      | 7.39              | 7.38              | 7.39             | 7.40       |

pre = pre drink; post = post drink; 2 min p = 2 min post exercise



## constant load test (placebo)

| n  | BIC post<br>[mmol·l <sup>-1</sup> ] | BIC 30 min<br>[mmol·l <sup>-1</sup> ] | BIC 2 min p<br>[mmol·l <sup>-1</sup> ] | BE post<br>[mmol·l <sup>-1</sup> ] | BE 30 min<br>[mmol·l <sup>-1</sup> ] | BE 2 min p<br>[mmol·l <sup>-1</sup> ] | pCO <sub>2</sub> post<br>[mmol·l <sup>-1</sup> ] | pCO <sub>2</sub> 30 min<br>[mmol·l <sup>-1</sup> ] | pCO <sub>2</sub> 2 min p<br>[mmol·l <sup>-1</sup> ] | pO <sub>2</sub> post<br>[mmol·l <sup>-1</sup> ] | pO <sub>2</sub> 30 min<br>[mmol·l <sup>-1</sup> ] | pO <sub>2</sub> 2 min p<br>[mmol·l <sup>-1</sup> ] |
|----|-------------------------------------|---------------------------------------|----------------------------------------|------------------------------------|--------------------------------------|---------------------------------------|--------------------------------------------------|----------------------------------------------------|-----------------------------------------------------|-------------------------------------------------|---------------------------------------------------|----------------------------------------------------|
| 1  | 25                                  | 19                                    | 15                                     | 1                                  | -4                                   | -10                                   | 40                                               | 33                                                 | 33                                                  | 95                                              | 82                                                | 99                                                 |
| 2  | 27                                  | 23                                    | 14                                     | 3                                  | -2                                   | -12                                   | 37                                               | 43                                                 | 33                                                  | 91                                              | 66                                                | 89                                                 |
| 3  | 26                                  | 23                                    | 20                                     | 3                                  | -1                                   | -4                                    | 39                                               | 38                                                 | 37                                                  | 85                                              | 78                                                | 78                                                 |
| 4  | 21                                  | 19                                    | 16                                     | -2                                 | -4                                   | -8                                    | 32                                               | 30                                                 | 26                                                  | 78                                              | 88                                                | 91                                                 |
| 5  | 25                                  | 20                                    | 12                                     | 0                                  | -4                                   | -15                                   | 39                                               | 36                                                 | 29                                                  | 85                                              | 69                                                | 72                                                 |
| 6  | 24                                  | 19                                    | 12                                     | 0                                  | -5                                   | -14                                   | 39                                               | 34                                                 | 28                                                  | 96                                              | 76                                                | 89                                                 |
| 7  | 26                                  | 21                                    | 14                                     | 2                                  | -3                                   | -12                                   | 40                                               | 37                                                 | 34                                                  | 79                                              | 75                                                | 81                                                 |
| 8  | 26                                  | 25                                    | 18                                     | 2                                  | 0                                    | -7                                    | 41                                               | 41                                                 | 34                                                  | 76                                              | 71                                                | 89                                                 |
| 9  | 24                                  | 21                                    | 16                                     | -1                                 | -3                                   | -9                                    | 40                                               | 36                                                 | 33                                                  | 90                                              | 76                                                | 89                                                 |
| 10 | 26                                  | 25                                    | 20                                     | 2                                  | 0                                    | -4                                    | 41                                               | 45                                                 | 37                                                  | 80                                              | 63                                                | 86                                                 |
| 11 | 27                                  | 22                                    | 20                                     | 2                                  | -2                                   | -5                                    | 43                                               | 37                                                 | 36                                                  | 80                                              | 66                                                | 92                                                 |
| 12 | 24                                  | 22                                    | 15                                     | 0                                  | -3                                   | -11                                   | 40                                               | 40                                                 | 32                                                  | 90                                              | 75                                                | 92                                                 |
| 13 | 25                                  | 22                                    | 17                                     | 2                                  | -1                                   | -5                                    | 36                                               | 32                                                 | 27                                                  | 95                                              | 80                                                | 84                                                 |
| 14 | 25                                  | 21                                    | 16                                     | 0                                  | -3                                   | -9                                    | 40                                               | 37                                                 | 34                                                  | 93                                              | 91                                                | 93                                                 |
| 15 | 24                                  | 22                                    | 21                                     | 0                                  | -2                                   | -4                                    | 39                                               | 37                                                 | 38                                                  | 95                                              | 78                                                | 97                                                 |
| 16 | 25                                  | 22                                    | 18                                     | 0                                  | -2                                   | -6                                    | 40                                               | 37                                                 | 33                                                  | 99                                              | 78                                                | 88                                                 |
| 17 | 24                                  | 18                                    | 14                                     | 0                                  | -6                                   | -11                                   | 41                                               | 31                                                 | 30                                                  | 99                                              | 71                                                | 84                                                 |
| 18 | 27                                  | 19                                    | 13                                     | 3                                  | -5                                   | -15                                   | 42                                               | 35                                                 | 33                                                  | 93                                              | 78                                                | 86                                                 |
| 19 | 24                                  | 22                                    | 15                                     | 0                                  | -2                                   | -10                                   | 37                                               | 36                                                 | 31                                                  | 97                                              | 73                                                | 90                                                 |
| 20 | 22                                  | 20                                    | 16                                     | -2                                 | -3                                   | -8                                    | 37                                               | 32                                                 | 28                                                  | 79                                              | 82                                                | 94                                                 |
| 21 | 25                                  | 24                                    | 22                                     | 0                                  | 0                                    | -2                                    | 41                                               | 40                                                 | 36                                                  | 93                                              | 73                                                | 85                                                 |

post = post drink; 2 min p= 2 min post exercise; BIC = bicarbonate concentration; BE = base excess;

pCO<sub>2</sub> = partial pressure of carbon dioxide; pO<sub>2</sub> = partial pressure of oxygen

## constant load test (placebo)

| n  | SO <sub>2</sub> post<br>[mmol·l <sup>-1</sup> ] | SO <sub>2</sub> 30 min<br>[mmol·l <sup>-1</sup> ] | SO <sub>2</sub> 2 min<br>[mmol·l <sup>-1</sup> ] | interval<br>[d] | interval tt<br>[d] | 95% IAT<br>[W] | 110% IAT<br>[W] | TTE<br>[min] | VO <sub>2</sub> top<br>[ml·min <sup>-1</sup> ] | VO <sub>2</sub> top<br>[ml·min <sup>-1</sup> ·kg <sup>-1</sup> ] | RER  |
|----|-------------------------------------------------|---------------------------------------------------|--------------------------------------------------|-----------------|--------------------|----------------|-----------------|--------------|------------------------------------------------|------------------------------------------------------------------|------|
| 1  | 97                                              | 96                                                | 97                                               | 7               | 14                 | 333            | 386             | 33.5         | 5292                                           | 67.9                                                             | 1.04 |
| 2  | 97                                              | 92                                                | 95                                               | 6               | 32                 | 277            | 321             | 44           | 4857                                           | 68.9                                                             | 1.01 |
| 3  | 97                                              | 95                                                | 95                                               | 7               | 15                 | 219            | 253             | 38           | 3832                                           | 55.5                                                             | 0.99 |
| 4  | 96                                              | 97                                                | 97                                               | 6               | 13                 | 143            | 165             | 50           | 2774                                           | 56.5                                                             | 0.99 |
| 5  | 96                                              | 93                                                | 91                                               | 7               | 7                  | 205            | 238             | 58           | 3905                                           | 62.0                                                             | 1.02 |
| 6  | 97                                              | 95                                                | 96                                               | 7               | 7                  | 171            | 198             | 48           | 3225                                           | 56.4                                                             | 1.04 |
| 7  | 96                                              | 95                                                | 94                                               | 7               | 15                 | 270            | 312             | 46           | 4611                                           | 60.7                                                             | 1.06 |
| 8  | 95                                              | 94                                                | 96                                               | 9               | 13                 | 246            | 285             | 52           | 4754                                           | 62.1                                                             | 1.01 |
| 9  | 97                                              | 95                                                | 96                                               | 6               | 18                 | 284            | 329             | 45           | 4972                                           | 70.0                                                             | 1.03 |
| 10 | 96                                              | 91                                                | 96                                               | 8               | 6                  | 276            | 319             | 48           | 4685                                           | 65.1                                                             | 0.96 |
| 11 | 96                                              | 93                                                | 97                                               | 6               | 14                 | 217            | 251             | 37           | 3627                                           | 51.1                                                             | 1.00 |
| 12 | 97                                              | 94                                                | 96                                               | 14              | 7                  | 250            | 289             | 60           | 4586                                           | 63.7                                                             | 1.04 |
| 13 | 98                                              | 96                                                | 97                                               | 9               | 11                 | 185            | 215             | 60           | 3177                                           | 42.6                                                             | 1.03 |
| 14 | 97                                              | 97                                                | 96                                               | 7               | 8                  | 190            | 220             | 40           | 3506                                           | 56.8                                                             | 1.03 |
| 15 | 97                                              | 95                                                | 97                                               | 15              | 7                  | 276            | 319             | 33           | 4513                                           | 52.5                                                             | 0.97 |
| 16 | 98                                              | 95                                                | 96                                               | 5               | 32                 | 228            | 264             | 35           | 3749                                           | 54.3                                                             | 1.04 |
| 17 | 97                                              | 94                                                | 95                                               | 7               | 9                  | 255            | 295             | 33           | 4576                                           | 66.8                                                             | 0.92 |
| 18 | 97                                              | 95                                                | 94                                               | 7               | 22                 | 249            | 288             | 36           | 3810                                           | 57.6                                                             | 1.09 |
| 19 | 98                                              | 94                                                | 96                                               | 7               | 19                 | 220            | 255             | 40           | 4182                                           | 58.7                                                             | 1.04 |
| 20 | 95                                              | 96                                                | 97                                               | 7               | 7                  | 131            | 151             | 46           | 1973                                           | 38.7                                                             | 1.02 |
| 21 | 97                                              | 94                                                | 96                                               | 8               | 11                 | 126            | 146             | 62.5         | 2202                                           | 41.5                                                             | 1.01 |

SO<sub>2</sub> = oxygen saturation; interval= days between constant load tests; interval tt = days between both test types; IAT= individual anaerobic threshold; TTE= time to exhaustion; VO<sub>2</sub> top= highest test specific oxygen consumption; RER= respiratory exchange ratio

### constant load test (placebo)

| n  | HR rest<br>[bpm] | HR 5 min<br>[bpm] | HR 10 min<br>[bpm] | HR 15 min<br>[bpm] | HR 20 min<br>[bpm] | HR 25 min<br>[bpm] | HR 30 min<br>[bpm] | HR 35 min<br>[bpm] | HF 40 min<br>[bpm]<br>n=15 | HR 45 min<br>[bpm]<br>n=11 | HR 50 min<br>[bpm]<br>n=7 | HR top<br>[bpm] |
|----|------------------|-------------------|--------------------|--------------------|--------------------|--------------------|--------------------|--------------------|----------------------------|----------------------------|---------------------------|-----------------|
| 1  | 74               | 159               | 164                | 168                | 169                | 173                | 174                | 184                |                            |                            |                           | 184             |
| 2  | 72               | 166               | 169                | 169                | 174                | 177                | 183                | 192                | 196                        | 198                        |                           | 198             |
| 3  | 67               | 140               | 147                | 149                | 151                | 153                | 157                | 164                | 166                        |                            |                           | 166             |
| 4  | 76               | 152               | 158                | 159                | 160                | 160                | 165                | 170                | 172                        | 174                        | 175                       | 175             |
| 5  | 52               | 151               | 159                | 159                | 160                | 166                | 170                | 180                | 178                        | 181                        | 182                       | 182             |
| 6  | 65               | 151               | 158                | 161                | 164                | 168                | 171                | 173                | 178                        | 179                        | 180                       | 180             |
| 7  | 76               | 162               | 162                | 163                | 162                | 159                | 166                | 177                | 185                        | 189                        |                           | 189             |
| 8  | 70               | 155               | 157                | 160                | 163                | 167                | 169                | 184                | 190                        | 192                        | 200                       | 200             |
| 9  | 73               | 172               | 177                | 181                | 181                | 185                | 182                | 191                | 192                        | 196                        |                           | 196             |
| 10 | 58               | 161               | 163                | 167                | 166                | 164                | 170                | 177                | 180                        |                            |                           | 183             |
| 11 | 70               | 137               | 147                | 148                | 152                | 154                | 158                | 166                |                            |                            |                           | 166             |
| 12 | 69               | 157               | 163                | 162                | 166                | 166                | 168                | 178                | 179                        | 181                        | 182                       | 187             |
| 13 | 61               | 125               | 131                | 132                | 133                | 136                | 140                | 149                | 153                        | 154                        | 155                       | 156             |
| 14 | 59               | 152               | 161                | 161                | 161                | 163                | 162                | 171                |                            |                            |                           | 173             |
| 15 | 75               | 173               | 180                | 181                | 184                | 183                | 185                | 192                |                            |                            |                           | 192             |
| 16 | 68               | 157               | 164                | 164                | 165                | 169                | 169                | 182                |                            |                            |                           | 182             |
| 17 | 61               | 158               | 168                | 173                | 177                | 181                | 185                | 191                |                            |                            |                           | 191             |
| 18 | 95               | 162               | 172                | 175                | 178                | 180                | 186                | 193                | 196                        |                            |                           | 196             |
| 19 | 73               | 151               | 159                | 164                | 165                | 164                | 168                | 184                | 191                        |                            |                           | 191             |
| 20 | 49               | 139               | 144                | 147                | 151                | 151                | 158                | 164                | 168                        | 170                        |                           | 170             |
| 21 | 69               | 147               | 158                | 160                | 160                | 165                | 168                | 176                | 178                        | 182                        | 187                       | 190             |

HR rest= heart rate at rest; HR top= highest test specific heart rate

### constant load test (placebo)

| n  | Lac rest<br>[mmol·l <sup>-1</sup> ] | Lac 5 min<br>[mmol·l <sup>-1</sup> ] | Lac 10 min<br>[mmol·l <sup>-1</sup> ] | Lac 15 min<br>[mmol·l <sup>-1</sup> ] | Lac 20 min<br>[mmol·l <sup>-1</sup> ] | Lac 25 min<br>[mmol·l <sup>-1</sup> ] | Lac 30 min<br>[mmol·l <sup>-1</sup> ] | Lac 35 min<br>[mmol·l <sup>-1</sup> ] | Lac 40 min<br>[mmol·l <sup>-1</sup> ] | Lac 45 min<br>[mmol·l <sup>-1</sup> ] | Lac 50 min<br>[mmol·l <sup>-1</sup> ] | Lac top<br>[mmol·l <sup>-1</sup> ] |
|----|-------------------------------------|--------------------------------------|---------------------------------------|---------------------------------------|---------------------------------------|---------------------------------------|---------------------------------------|---------------------------------------|---------------------------------------|---------------------------------------|---------------------------------------|------------------------------------|
|    |                                     |                                      |                                       |                                       |                                       |                                       |                                       |                                       | n=15                                  | n=11                                  | n=7                                   |                                    |
| 1  | 0.7                                 | 3.6                                  | 3.9                                   | 4.3                                   | 4.8                                   | 5.0                                   | 5.0                                   | 8.8                                   |                                       |                                       |                                       | 8.8                                |
| 2  | 0.5                                 | 3.6                                  | 2.8                                   | 2.9                                   | 2.7                                   | 3.4                                   | 3.3                                   | 6.9                                   | 9.0                                   | 10.5                                  |                                       | 10.5                               |
| 3  | 0.5                                 | 2.9                                  | 3.2                                   | 3.8                                   | 3.9                                   | 3.6                                   | 3.9                                   | 5.7                                   | 6.5                                   |                                       |                                       | 6.5                                |
| 4  | 0.9                                 | 3.0                                  | 2.6                                   | 2.5                                   | 2.4                                   | 2.5                                   | 2.4                                   | 4.4                                   | 4.8                                   | 5.7                                   | 6.1                                   | 6.1                                |
| 5  | 0.5                                 | 4.2                                  | 4.4                                   | 4.5                                   | 4.7                                   | 4.7                                   | 4.9                                   | 7.6                                   | 9.8                                   | 10.7                                  | 10.8                                  | 10.6                               |
| 6  | 1.1                                 | 3.4                                  | 3.2                                   | 3.4                                   | 3.4                                   | 4.0                                   | 4.5                                   | 6.1                                   | 8.0                                   | 9.8                                   | 11.2                                  | 11.2                               |
| 7  | 0.7                                 | 5.9                                  | 5.7                                   | 5.6                                   | 5.2                                   | 4.7                                   | 4.5                                   | 7.2                                   | 9.5                                   | 11.7                                  |                                       | 11.7                               |
| 8  | 0.7                                 | 1.6                                  | 1.4                                   | 1.4                                   | 1.9                                   | 1.8                                   | 1.7                                   | 3.5                                   | 4.4                                   | 4.8                                   | 6.5                                   | 6.5                                |
| 9  | 0.5                                 | 3.3                                  | 3.8                                   | 4.0                                   | 3.6                                   | 3.4                                   | 3.2                                   | 6.0                                   | 6.9                                   | 8.2                                   |                                       | 8.2                                |
| 10 | 1.0                                 | 3.5                                  | 2.9                                   | 2.3                                   | 2.0                                   | 2.0                                   | 2.1                                   | 3.6                                   | 4.6                                   |                                       |                                       | 5.7                                |
| 11 | 0.7                                 | 3.9                                  | 3.2                                   | 3.0                                   | 3.1                                   | 3.2                                   | 2.9                                   | 5.2                                   |                                       |                                       |                                       | 5.2                                |
| 12 | 1.2                                 | 3.9                                  | 3.1                                   | 3.1                                   | 2.7                                   | 3.2                                   | 2.4                                   | 6.0                                   | 6.1                                   | 6.6                                   | 7.1                                   | 8.8                                |
| 13 | 0.6                                 | 3.8                                  | 3.4                                   | 2.6                                   | 2.6                                   | 2.5                                   | 2.6                                   | 4.3                                   | 5.1                                   | 5.1                                   | 5.6                                   | 6.1                                |
| 14 | 0.6                                 | 4.6                                  | 4.8                                   | 4.4                                   | 8.5                                   | 4.5                                   | 6.6                                   | 8.6                                   |                                       |                                       |                                       | 8.5                                |
| 15 | 0.5                                 | 2.9                                  | 2.6                                   | 2.4                                   | 2.7                                   | 2.5                                   | 2.6                                   | 3.9                                   |                                       |                                       |                                       | 3.9                                |
| 16 | 0.5                                 | 4.2                                  | 3.4                                   | 3.4                                   | 3.1                                   | 2.8                                   | 2.5                                   | 4.6                                   |                                       |                                       |                                       | 4.6                                |
| 17 | 0.9                                 | 4.1                                  | 3.7                                   | 4.1                                   | 5.9                                   | 5.9                                   | 5.8                                   | 8.1                                   |                                       |                                       |                                       | 8.1                                |
| 18 | 0.5                                 | 6.1                                  | 6.0                                   | 5.2                                   | 5.5                                   | 6.0                                   | 6.4                                   | 10.8                                  | 12.9                                  |                                       |                                       | 12.9                               |
| 19 | 0.5                                 | 4.8                                  | 4.2                                   | 4.0                                   | 3.5                                   | 2.7                                   | 2.6                                   | 5.9                                   | 9.5                                   |                                       |                                       | 9.5                                |
| 20 | 0.5                                 | 4.5                                  | 3.9                                   | 2.9                                   | 2.6                                   | 2.5                                   | 2.6                                   | 4.4                                   | 5.0                                   | 5.4                                   |                                       | 5.4                                |
| 21 | 0.7                                 | 2.9                                  | 2.0                                   | 1.5                                   | 1.4                                   | 1.4                                   | 1.3                                   | 2.1                                   | 2.3                                   | 2.5                                   | 2.3                                   | 2.3                                |

Lac rest= lactate concentration at rest,  
Lac top= highest test specific lactate concentration

## constant load test (BICA)

| n  | ph pre | ph post | ph 5 min | ph 10 min | ph 15 min | ph 20 min | ph 25 min | ph 30 min | ph 35 min | ph 40 min<br>n=15 | ph 45 min<br>n=11 | ph 50 min<br>n=7 | pH 2 min p |
|----|--------|---------|----------|-----------|-----------|-----------|-----------|-----------|-----------|-------------------|-------------------|------------------|------------|
| 1  | 7.45   | 7.50    | 7.50     | 7.47      | 7.47      | 7.47      | 7.46      | 7.46      | 7.39      |                   |                   |                  | 7.38       |
| 2  | 7.44   | 7.50    | 7.43     | 7.44      | 7.45      | 7.45      | 7.45      | 7.45      | 7.40      | 7.39              | 7.38              |                  | 7.39       |
| 3  | 7.40   | 7.48    | 7.44     | 7.44      | 7.44      | 7.44      | 7.43      | 7.45      | 7.42      | 7.41              |                   |                  | 7.40       |
| 4  | 7.43   | 7.51    | 7.49     | 7.51      | 7.50      | 7.52      | 7.51      | 7.51      | 7.52      | 7.50              | 7.49              | 7.48             | 7.47       |
| 5  | 7.41   | 7.46    | 7.39     | 7.40      | 7.42      | 7.43      | 7.43      | 7.44      | 7.41      | 7.39              | 7.37              | 7.36             | 7.33       |
| 6  | 7.44   | 7.49    | 7.42     | 7.42      | 7.43      | 7.44      | 7.43      | 7.40      | 7.38      | 7.37              | 7.36              | 7.35             | 7.33       |
| 7  | 7.41   | 7.50    | 7.42     | 7.42      | 7.43      | 7.45      | 7.44      | 7.44      | 7.40      | 7.33              | 7.36              |                  | 7.33       |
| 8  | 7.43   | 7.50    | 7.43     | 7.43      | 7.43      | 7.43      | 7.42      | 7.44      | 7.41      | 7.43              | 7.42              | 7.43             | 7.37       |
| 9  | 7.41   | 7.47    | 7.42     | 7.43      | 7.44      | 7.44      | 7.43      | 7.42      | 7.41      | 7.39              | 7.4               |                  | 7.45       |
| 10 | 7.41   | 7.48    | 7.43     | 7.44      | 7.44      | 7.46      | 7.44      | 7.45      | 7.42      | 7.37              |                   |                  | 7.39       |
| 11 | 7.41   | 7.50    | 7.47     | 7.48      | 7.49      | 7.48      | 7.46      | 7.47      | 7.41      |                   |                   |                  | 7.39       |
| 12 | 7.42   | 7.46    | 7.41     | 7.42      | 7.43      | 7.42      | 7.44      | 7.43      | 7.41      | 7.40              | 7.39              | 7.38             | 7.37       |
| 13 | 7.43   | 7.51    | 7.47     | 7.49      | 7.50      | 7.50      | 7.51      | 7.51      | 7.50      | 7.49              | 7.47              | 7.48             | 7.47       |
| 14 | 7.40   | 7.45    | 7.42     | 7.42      | 7.44      | 7.44      | 7.45      | 7.46      | 7.41      |                   |                   |                  | 7.39       |
| 15 | 7.46   | 7.48    | 7.44     | 7.43      | 7.46      | 7.46      | 7.46      | 7.44      | 7.42      |                   |                   |                  | 7.41       |
| 16 | 7.46   | 7.48    | 7.42     | 7.44      | 7.45      | 7.45      | 7.47      | 7.45      | 7.43      |                   |                   |                  | 7.42       |
| 17 | 7.40   | 7.48    | 7.42     | 7.44      | 7.44      | 7.43      | 7.43      | 7.44      | 7.37      |                   |                   |                  | 7.33       |
| 18 | 7.44   | 7.45    | 7.40     | 7.42      | 7.44      | 7.45      | 7.45      | 7.45      | 7.40      | 7.35              |                   |                  | 7.33       |
| 19 | 7.44   | 7.47    | 7.39     | 7.41      | 7.42      | 7.43      | 7.45      | 7.45      | 7.41      | 7.39              |                   |                  | 7.36       |
| 20 | 7.46   | 7.47    | 7.46     | 7.46      | 7.49      | 7.48      | 7.48      | 7.49      | 7.49      | 7.49              | 7.48              |                  | 7.49       |
| 21 | 7.45   | 7.49    | 7.42     | 7.41      | 7.43      | 7.41      | 7.42      | 7.43      | 7.44      | 7.44              | 7.45              | 7.46             | 7.45       |

pre = pre drink; post = post drink; 2 min p = 2 min post exercise

## constant load test (BICA)

| n  | BIC post<br>[mmol·l <sup>-1</sup> ] | BIC 30 min<br>[mmol·l <sup>-1</sup> ] | BIC 2 min p<br>[mmol·l <sup>-1</sup> ] | BE post<br>[mmol·l <sup>-1</sup> ] | BE 30 min<br>[mmol·l <sup>-1</sup> ] | BE 2 min p<br>[mmol·l <sup>-1</sup> ] | pCO <sub>2</sub> post<br>[mmol·l <sup>-1</sup> ] | pCO <sub>2</sub> 30 min<br>[mmol·l <sup>-1</sup> ] | pCO <sub>2</sub> 2 min p<br>[mmol·l <sup>-1</sup> ] | pO <sub>2</sub> post<br>[mmol·l <sup>-1</sup> ] | pO <sub>2</sub> 30 min<br>[mmol·l <sup>-1</sup> ] | pO <sub>2</sub> 2 min p<br>[mmol·l <sup>-1</sup> ] |
|----|-------------------------------------|---------------------------------------|----------------------------------------|------------------------------------|--------------------------------------|---------------------------------------|--------------------------------------------------|----------------------------------------------------|-----------------------------------------------------|-------------------------------------------------|---------------------------------------------------|----------------------------------------------------|
| 1  | 32                                  | 28                                    | 19                                     | 9                                  | 1                                    | -1                                    | 42                                               | 33                                                 | 34                                                  | 82                                              | 68                                                | 92                                                 |
| 2  | 32                                  | 29                                    | 20                                     | 8                                  | 5                                    | -4                                    | 41                                               | 42                                                 | 34                                                  | 86                                              | 64                                                | 84                                                 |
| 3  | 32                                  | 29                                    | 25                                     | 8                                  | 4                                    | 0                                     | 43                                               | 41                                                 | 40                                                  | 87                                              | 72                                                | 71                                                 |
| 4  | 29                                  | 26                                    | 23                                     | 5                                  | 3                                    | 2                                     | 36                                               | 32                                                 | 33                                                  | 81                                              | 91                                                | 80                                                 |
| 5  | 33                                  | 28                                    | 16                                     | 8                                  | 3                                    | -7                                    | 46                                               | 41                                                 | 32                                                  | 60                                              | 71                                                | 74                                                 |
| 6  | 32                                  | 25                                    | 15                                     | 7                                  | -1                                   | -8                                    | 42                                               | 39                                                 | 30                                                  | 78                                              | 69                                                | 75                                                 |
| 7  | 32                                  | 28                                    | 18                                     | 8                                  | 3                                    | -5                                    | 41                                               | 39                                                 | 34                                                  | 83                                              | 69                                                | 84                                                 |
| 8  | 33                                  | 29                                    | 20                                     | 9                                  | 5                                    | -4                                    | 42                                               | 44                                                 | 37                                                  | 86                                              | 68                                                | 91                                                 |
| 9  | 31                                  | 27                                    | 23                                     | 7                                  | 3                                    | 0                                     | 44                                               | 41                                                 | 34                                                  | 88                                              | 67                                                | 88                                                 |
| 10 | 33                                  | 29                                    | 11                                     | 8                                  | 3                                    | -10                                   | 45                                               | 40                                                 | 19                                                  | 67                                              | 68                                                | 87                                                 |
| 11 | 33                                  | 31                                    | 22                                     | 9                                  | 6                                    | -2                                    | 45                                               | 40                                                 | 37                                                  | 82                                              | 66                                                | 83                                                 |
| 12 | 30                                  | 27                                    | 20                                     | 6                                  | 3                                    | -2                                    | 42                                               | 42                                                 | 35                                                  | 70                                              | 66                                                | 77                                                 |
| 13 | 31                                  | 26                                    | 21                                     | 8                                  | 5                                    | -1                                    | 40                                               | 35                                                 | 29                                                  | 76                                              | 68                                                | 75                                                 |
| 14 | 32                                  | 27                                    | 22                                     | 7                                  | 3                                    | -3                                    | 45                                               | 38                                                 | 38                                                  | 88                                              | 80                                                | 90                                                 |
| 15 | 31                                  | 27                                    | 24                                     | 7                                  | 2                                    | 1                                     | 42                                               | 36                                                 | 39                                                  | 93                                              | 78                                                | 84                                                 |
| 16 | 33                                  | 28                                    | 24                                     | 6                                  | 4                                    | 0                                     | 42                                               | 40                                                 | 37                                                  | 86                                              | 75                                                | 89                                                 |
| 17 | 30                                  | 25                                    | 16                                     | 7                                  | 1                                    | -9                                    | 42                                               | 35                                                 | 31                                                  | 84                                              | 75                                                | 87                                                 |
| 18 | 30                                  | 27                                    | 16                                     | 7                                  | 2                                    | -10                                   | 45                                               | 40                                                 | 32                                                  | 85                                              | 70                                                | 85                                                 |
| 19 | 29                                  | 27                                    | 18                                     | 6                                  | 3                                    | -4                                    | 40                                               | 39                                                 | 32                                                  | 93                                              | 69                                                | 81                                                 |
| 20 | 30                                  | 27                                    | 23                                     | 6                                  | 4                                    | 0                                     | 41                                               | 35                                                 | 30                                                  | 84                                              | 71                                                | 95                                                 |
| 21 | 30                                  | 29                                    | 28                                     | 6                                  | 4                                    | 0                                     | 40                                               | 43                                                 | 42                                                  | 79                                              | 71                                                | 81                                                 |

post = post drink; 2 min p= 2 min post exercise; BIC = bicarbonate concentration; BE = base excess;

pCO<sub>2</sub> = partial pressure of carbon dioxide; pO<sub>2</sub> = partial pressure of oxygen

## constant load test (BICA)

| n  | SO <sub>2</sub> post<br>[mmol·l <sup>-1</sup> ] | SO <sub>2</sub> 30 min<br>[mmol·l <sup>-1</sup> ] | SO <sub>2</sub> 2 min<br>[mmol·l <sup>-1</sup> ] | TTE<br>[min] | VO <sub>2</sub> top<br>[ml·min <sup>-1</sup> ] | VO <sub>2</sub> top<br>[ml·min <sup>-1</sup> ·kg <sup>-1</sup> ] | RER  |
|----|-------------------------------------------------|---------------------------------------------------|--------------------------------------------------|--------------|------------------------------------------------|------------------------------------------------------------------|------|
| 1  | 97                                              | 94                                                | 98                                               | 32.5         | 5018                                           | 64.3                                                             | 1.10 |
| 2  | 97                                              | 93                                                | 96                                               | 61           | 5062                                           | 73.9                                                             | 0.98 |
| 3  | 97                                              | 95                                                | 94                                               | 56           | 3722                                           | 53.9                                                             | 1.03 |
| 4  | 97                                              | 98                                                | 96                                               | 60           | 2778                                           | 55.6                                                             | 0.93 |
| 5  | 92                                              | 94                                                | 94                                               | 67           | 3817                                           | 60.6                                                             | 1.13 |
| 6  | 96                                              | 94                                                | 94                                               | 64           | 3368                                           | 57.1                                                             | 0.99 |
| 7  | 97                                              | 94                                                | 96                                               | 44           | 4973                                           | 64.6                                                             | 1.03 |
| 8  | 97                                              | 94                                                | 97                                               | 63           | 4426                                           | 57.5                                                             | 1.10 |
| 9  | 97                                              | 93                                                | 97                                               | 61.5         | 5379                                           | 74.7                                                             | 0.97 |
| 10 | 94                                              | 94                                                | 99                                               | 38           | 4572                                           | 63.5                                                             | 1.07 |
| 11 | 97                                              | 94                                                | 96                                               | 44           | 3982                                           | 56.1                                                             | 1.03 |
| 12 | 95                                              | 94                                                | 95                                               | 50           | 4301                                           | 60.6                                                             | 1.00 |
| 13 | 96                                              | 94                                                | 96                                               | 57.5         | 3124                                           | 42.2                                                             | 1.03 |
| 14 | 97                                              | 96                                                | 97                                               | 36.5         | 3765                                           | 57.9                                                             | 1.03 |
| 15 | 97                                              | 96                                                | 94                                               | 32.5         | 4185                                           | 50.7                                                             | 0.96 |
| 16 | 97                                              | 95                                                | 97                                               | 36           | 4040                                           | 58.6                                                             | 1.06 |
| 17 | 97                                              | 95                                                | 96                                               | 40           | 4477                                           | 64.9                                                             | 1.06 |
| 18 | 97                                              | 94                                                | 96                                               | 40           | 4015                                           | 62.2                                                             | 1.08 |
| 19 | 97                                              | 94                                                | 95                                               | 45           | 4278                                           | 59.4                                                             | 1.02 |
| 20 | 97                                              | 95                                                | 98                                               | 61.3         | 2127                                           | 42.1                                                             | 1.06 |
| 21 | 96                                              | 94                                                | 96                                               | 50           | 2524                                           | 48.5                                                             | 1.01 |

SO<sub>2</sub> = oxygen saturation; IAT= individual anaerobic threshold; TTE= time to exhaustion;

VO<sub>2</sub> top= highest test specific oxygen consumption; RER= respiratory exchange ratio

## constant load test (BICA)

| n  | HR rest<br>[bpm] | HR 5 min<br>[bpm] | HR 10 min<br>[bpm] | HR 15 min<br>[bpm] | HR 20 min<br>[bpm] | HR 25 min<br>[bpm] | HR 30 min<br>[bpm] | HR 35 min<br>[bpm] | HF 40 min<br>[bpm]<br>n=15 | HR 45 min<br>[bpm]<br>n=11 | HR 50 min<br>[bpm]<br>n=7 | HR top<br>[bpm] |
|----|------------------|-------------------|--------------------|--------------------|--------------------|--------------------|--------------------|--------------------|----------------------------|----------------------------|---------------------------|-----------------|
| 1  | 75               | 161               | 168                | 169                | 173                | 174                | 180                | 186                |                            |                            |                           | 186             |
| 2  | 76               | 163               | 168                | 170                | 171                | 175                | 183                | 186                | 191                        | 192                        |                           | 195             |
| 3  | 71               | 141               | 148                | 152                | 152                | 151                | 155                | 163                | 168                        |                            |                           | 173             |
| 4  | 65               | 150               | 154                | 156                | 155                | 156                | 158                | 164                | 165                        | 166                        | 167                       | 167             |
| 5  | 61               | 148               | 155                | 156                | 158                | 160                | 161                | 172                | 175                        | 177                        | 176                       | 181             |
| 6  | 75               | 140               | 151                | 157                | 160                | 165                | 167                | 172                | 173                        | 174                        | 177                       | 178             |
| 7  | 71               | 158               | 161                | 164                | 160                | 168                | 171                | 175                | 182                        | 184                        |                           | 184             |
| 8  | 70               | 163               | 166                | 169                | 175                | 172                | 172                | 182                | 185                        | 189                        | 189                       | 200             |
| 9  | 83               | 173               | 177                | 183                | 183                | 179                | 182                | 191                | 190                        | 189                        |                           | 195             |
| 10 | 51               | 164               | 168                | 170                | 171                | 174                | 177                | 188                | 189                        |                            |                           | 189             |
| 11 | 70               | 145               | 155                | 156                | 159                | 161                | 164                | 170                |                            |                            |                           | 174             |
| 12 | 64               | 152               | 153                | 154                | 155                | 162                | 164                | 170                | 175                        | 177                        | 179                       | 179             |
| 13 | 60               | 133               | 135                | 138                | 139                | 139                | 143                | 149                | 151                        | 152                        | 153                       | 156             |
| 14 | 67               | 157               | 162                | 164                | 163                | 163                | 163                | 172                |                            |                            |                           | 172             |
| 15 | 70               | 178               | 187                | 190                | 191                | 193                | 194                | 200                |                            |                            |                           | 200             |
| 16 | 83               | 162               | 171                | 173                | 169                | 175                | 181                | 187                |                            |                            |                           | 187             |
| 17 | 71               | 157               | 171                | 171                | 175                | 177                | 181                | 187                |                            |                            |                           | 192             |
| 18 | 76               | 160               | 168                | 172                | 174                | 178                | 180                | 189                | 192                        |                            |                           | 192             |
| 19 | 75               | 151               | 157                | 160                | 160                | 162                | 167                | 179                | 185                        |                            |                           | 189             |
| 20 | 54               | 138               | 138                | 142                | 145                | 148                | 150                | 158                | 159                        | 162                        |                           | 164             |
| 21 | 65               | 155               | 166                | 166                | 169                | 175                | 182                | 189                | 188                        | 190                        | 190                       | 190             |

HR rest= heart rate at rest; HR top= highest test specific heart rate



## constant load test (BICA)

| n  | Lac rest<br>[mmol·l <sup>-1</sup> ] | Lac 5 min<br>[mmol·l <sup>-1</sup> ] | Lac 10 min<br>[mmol·l <sup>-1</sup> ] | Lac 15 min<br>[mmol·l <sup>-1</sup> ] | Lac 20 min<br>[mmol·l <sup>-1</sup> ] | Lac 25 min<br>[mmol·l <sup>-1</sup> ] | Lac 30 min<br>[mmol·l <sup>-1</sup> ] | Lac 35 min<br>[mmol·l <sup>-1</sup> ] | Lac 40 min<br>[mmol·l <sup>-1</sup> ]<br>n=15 | Lac 45 min<br>[mmol·l <sup>-1</sup> ]<br>n=11 | Lac 50 min<br>[mmol·l <sup>-1</sup> ]<br>n=7 | Lac top<br>[mmol·l <sup>-1</sup> ] |
|----|-------------------------------------|--------------------------------------|---------------------------------------|---------------------------------------|---------------------------------------|---------------------------------------|---------------------------------------|---------------------------------------|-----------------------------------------------|-----------------------------------------------|----------------------------------------------|------------------------------------|
| 1  | 1.6                                 | 4.7                                  | 7.2                                   | 7.6                                   | 7.9                                   | 7.8                                   | 8.0                                   | 10.7                                  |                                               |                                               |                                              | 10.7                               |
| 2  | 0.7                                 | 3.9                                  | 3.7                                   | 3.4                                   | 3.1                                   | 2.8                                   | 3.0                                   | 5.7                                   | 7.5                                           | 8.7                                           |                                              | 10.5                               |
| 3  | 0.6                                 | 3.4                                  | 3.9                                   | 3.9                                   | 3.9                                   | 4.1                                   | 3.9                                   | 6.1                                   | 7.5                                           |                                               |                                              | 8.0                                |
| 4  | 1.8                                 | 3.0                                  | 2.8                                   | 2.8                                   | 2.7                                   | 2.6                                   | 2.3                                   | 3.4                                   | 4.1                                           | 4.6                                           | 4.8                                          | 4.9                                |
| 5  | 0.8                                 | 5.6                                  | 5.9                                   | 5.6                                   | 5.4                                   | 5.0                                   | 4.7                                   | 7.2                                   | 8.9                                           | 10.8                                          | 11.4                                         | 13.2                               |
| 6  | 0.9                                 | 4.5                                  | 3.8                                   | 3.7                                   | 4.1                                   | 4.3                                   | 4.7                                   | 6.4                                   | 8.0                                           | 9.0                                           | 10.0                                         | 13.5                               |
| 7  | 1.3                                 | 5.3                                  | 5.8                                   | 5.9                                   | 6.0                                   | 6.0                                   | 6.0                                   | 8.6                                   | 11.3                                          | 13.7                                          |                                              | 13.7                               |
| 8  | 1.1                                 | 3.3                                  | 2.9                                   | 3.2                                   | 3.4                                   | 3.5                                   | 3.2                                   | 4.3                                   | 5.2                                           | 5.6                                           | 5.8                                          | 8.6                                |
| 9  | 0.9                                 | 3.9                                  | 4.3                                   | 4.2                                   | 4.1                                   | 3.9                                   | 3.5                                   | 6.3                                   | 7.9                                           | 7.7                                           |                                              | 7.2                                |
| 10 | 1.0                                 | 4.0                                  | 3.8                                   | 3.7                                   | 3.8                                   | 4.0                                   | 4.0                                   | 7.7                                   | 9.6                                           |                                               |                                              | 9.6                                |
| 11 | 1.0                                 | 4.3                                  | 3.5                                   | 3.3                                   | 5.0                                   | 4.2                                   | 4.7                                   | 7.9                                   |                                               |                                               |                                              | 10.6                               |
| 12 | 0.6                                 | 3.3                                  | 3.0                                   | 2.4                                   | 2.5                                   | 2.6                                   | 3.1                                   | 5.1                                   | 6.4                                           | 7.2                                           | 8.4                                          | 8.4                                |
| 13 | 0.9                                 | 4.2                                  | 4.0                                   | 3.6                                   | 3.6                                   | 3.3                                   | 3.3                                   | 5.0                                   | 6.0                                           | 5.6                                           | 6.6                                          | 7.8                                |
| 14 | 0.5                                 | 4.4                                  | 4.7                                   | 4.0                                   | 4.0                                   | 4.0                                   | 4.1                                   | 6.4                                   |                                               |                                               |                                              | 6.4                                |
| 15 | 0.5                                 | 3.9                                  | 4.0                                   | 3.9                                   | 3.8                                   | 4.2                                   | 3.3                                   | 4.9                                   |                                               |                                               |                                              | 4.9                                |
| 16 | 0.8                                 | 3.8                                  | 3.4                                   | 3.3                                   | 3.1                                   | 3.2                                   | 3.1                                   | 5.7                                   |                                               |                                               |                                              | 5.7                                |
| 17 | 0.9                                 | 6.2                                  | 6.4                                   | 7.0                                   | 7.6                                   | 7.8                                   | 7.5                                   | 11.7                                  |                                               |                                               |                                              | 14.0                               |
| 18 | 0.6                                 | 6.3                                  | 6.1                                   | 5.9                                   | 5.4                                   | 5.4                                   | 5.6                                   | 9.3                                   | 12.3                                          |                                               |                                              | 12.3                               |
| 19 | 0.9                                 | 5.9                                  | 5.7                                   | 5.1                                   | 4.5                                   | 4.2                                   | 4.0                                   | 7.8                                   | 9.8                                           |                                               |                                              | 11.6                               |
| 20 | 0.6                                 | 4.3                                  | 3.9                                   | 3.2                                   | 3.4                                   | 3.4                                   | 3.1                                   | 4.1                                   | 4.6                                           | 5.1                                           |                                              | 5.7                                |
| 21 | 0.8                                 | 2.7                                  | 2.4                                   | 2.0                                   | 1.8                                   | 1.9                                   | 1.8                                   | 3.4                                   | 3.8                                           | 4.1                                           | 3.8                                          | 3.8                                |

Lac rest= lactate concentration at rest,  
Lac top= highest test specific lactate concentration
